# Supplementary material for: Significant correlation between plasma proteome profile and pain intensity, sensitivity, and psychological distress in women with fibromyalgia
Source: PubMed Central journal article supplement (PMC7385654; doi:10.1038/s41598-020-69422-z), 2020-07-27

## Significant correlation between plasma proteome profile and pain intensity, sensitivity, and psychological distress in women with fibromyalgia

Karin Wåhlén, MSc<sup>1\*</sup>, Malin Ernberg, DDS, PhD<sup>2</sup>, Eva Kosek, MD, PhD<sup>3</sup>, Kaisa Mannerkorpi, FT, PhD<sup>4</sup>, Björn Gerdle, MD, PhD<sup>1+</sup>, Bijar Ghafouri, PhD<sup>1+</sup>

<sup>1</sup>Pain and Rehabilitation Center, and Department of Health, Medicine and Caring Sciences, Linköping University, Linköping, Sweden.

<sup>2</sup>Department of Dental Medicine, Karolinska Institutet, and Scandinavian Center for Orofacial Neurosciences (SCON), SE-141 04 Huddinge, Sweden.

<sup>3</sup>Department of Clinical Neuroscience, Karolinska Institutet, SE-171 77, Stockholm, Sweden.

<sup>4</sup>Department of Health and Rehabilitation/Physiotherapy, Institute of Neuroscience and Physiology, Sahlgrenska Academy, Gothenburg University, Gothenburg, Sweden

<sup>+</sup>Shared last author.

\*Corresponding author:

Karin Wåhlén,

Pain and Rehabilitation Center,

Department of Health, Medicine and Caring Sciences,

PAINOMICS<sup>®</sup> Laboratory

Linköping University

SE-581 85 Linköping, Sweden

Phone: +46 10 103 4155

Email: [karin.wahlen@liu.se](mailto:karin.wahlen@liu.se)

**Supplementary Table S1.** Mass spectrometry data of identified proteins. Spot numbers correspond to marked protein spots on the two-dimensional gel in supplementary Figure S1 and numbers in respective table for each multivariate model. Part of the MS data have been published previously (see references in last column). For details of the methodology, see method section and previous published studies [1, 2, 3]. MW: molecular weight, pI: isoelectric point.

| Spot number | Protein name            | Accession number (UniProt) | Theoretical MW (kDa)/pI | Intensity | SCORE | MOWSE score | Number of peptides | Sequence coverage (%) | Published MS data |
|-------------|-------------------------|----------------------------|-------------------------|-----------|-------|-------------|--------------------|-----------------------|-------------------|
| 2706        | Alpha-1-antitrypsin     | P01009                     | 46.7 / 5.4              | 2.16E+09  | 323   | -           | 20                 | 58.4                  |                   |
| 1315        |                         |                            |                         | -         | -     | -           | -                  | -                     |                   |
| 2310        |                         |                            |                         | 9.91E+09  | 323   | -           | 25                 | 60.8                  | [1]               |
| 3502        | Alpha-1B-glycoprotein   | P04217                     | 54.3 / 5.4              | 1.62E+08  | 323   | -           | 10                 | 36.4                  |                   |
| 3501        |                         |                            |                         | 2.31E+09  | 323   | -           | 14                 | 45.3                  |                   |
| 2406        | Alpha-2-antiplasmin     | P08697                     | 54.6 / 5.9              | -         | -     | -           | -                  | -                     | [4]               |
| 2410        |                         |                            |                         | -         | -     | 1.26E+04    | 12                 | 28.9                  |                   |
| 2508        |                         |                            |                         | -         | -     | 2.40E+05    | 11                 | 30.8                  | [1]               |
| 3403        |                         |                            |                         | -         | -     | -           | -                  | -                     | [4]               |
| 4401        |                         |                            |                         | -         | -     | -           | -                  | -                     | [4]               |
| 1202        | Alpha-2-HS-glycoprotein | P02765                     | 39.3 / 5.4              | -         | -     | -           | -                  | -                     | [4]               |
| 1203        |                         |                            |                         | -         | -     | -           | -                  | -                     | [4]               |
| 1205        |                         |                            |                         | -         | -     | -           | -                  | -                     | [4]               |
| 1207        |                         |                            |                         | -         | -     | -           | -                  | -                     | [4]               |
| 1316        |                         |                            |                         | -         | -     | -           | -                  | -                     | [4]               |
| 1317        |                         |                            |                         | -         | -     | 2.18E+7     | 9                  | 27.5                  |                   |
| 4808        | Alpha-2-macroglobulin   | P01023                     | 163.3 / 6.0             | 6.23E+08  | 323   | -           | 31                 | 26.1                  | [1]               |
| 4814        |                         |                            |                         | 1.00E+08  | 323   | -           | 31                 | 23                    |                   |
| 5903        |                         |                            |                         | 1.20E+08  | 323   | -           | 22                 | 19.1                  |                   |

|      |                                 |        |             |          |     |          |    |      |        |
|------|---------------------------------|--------|-------------|----------|-----|----------|----|------|--------|
| 5905 | Alpha-2-macroglobulin           | P01023 | 163.3 / 6.0 | -        | -   | -        | -  | -    |        |
| 1405 | Angiotensinogen                 | P01019 | 53.2 / 5.9  | 9.88E+07 | 276 | -        | 10 | 26.6 |        |
| 3207 | Antithrombin-III                | P01008 | 52.6 / 6.3  | 2.03E+09 | 323 | -        | 20 | 51.9 |        |
| 3010 | Apolipoprotein A-I              | P02647 | 30.8 / 5.6  | 1.43E+10 | 323 | -        | 26 | 70.0 |        |
| 1004 | Apolipoprotein C-III            | P02656 | 10.9 / 5.2  | 3.21E+08 | 265 | -        | 4  | 37.4 |        |
| 6203 | Beta-2-glycoprotein 1           | P02749 | 38.3 / 8.3  | 1.16E+08 | 323 | -        | 9  | 30.4 | [1]    |
| 7206 |                                 |        |             | 7.46E+08 | 323 | -        | 11 | 51.9 |        |
| 6507 | C4b-binding protein alpha chain | P04003 | 67.0 / 7.2  | -        | -   | 8.91E+6  | 13 | 22.8 |        |
| 3810 | Ceruloplasmin                   | P00450 | 122.2 / 5.4 | -        | -   | -        | -  | -    | [2, 4] |
| 1107 | Clusterin                       | P10909 | 52.5 / 5.9  | 3.82E+08 | 323 | -        | 9  | 27.6 | [1]    |
| 3728 | Complement C1r subcomponent     | P00736 | 80.1 / 5.8  | -        | -   | 2.98E+09 | 10 | 20.6 | [1, 2] |
| 5602 |                                 |        |             | -        | -   | 4.38     | 4  | 8.4  | [1, 2] |
| 5706 |                                 |        |             | -        | -   | 1.71E+12 | 19 | 30.6 | [1, 2] |
| 7403 | Complement C3 beta chain        | P01024 | 71.3 / 6.8  | 3.20E+07 | 267 | -        | 18 | 40.9 |        |
| 6726 | Complement C3b alpha chain      | P01024 | 103.9/5.2   | 1.63E+07 | 323 | -        | 15 | 13   | [1]    |
| 7101 | Complement C4-B (fragment)      | POC0L5 | 33.1 / 6.4  | -        | -   | 5.23E+03 | 5  | 14.1 | [1]    |
| 8101 |                                 |        |             | -        | -   | 3.19E+8  | 12 | 50.9 | [1]    |
| 2113 | Complement factor I light chain | P05156 | 27.6 / 6.2  | -        | -   | 1.58E+03 | 6  | 32.0 | [1, 2] |
| 8402 | Fibrinogen alpha chain          | P02671 | 94.9 / 5.7  | -        | -   | -        | -  | -    | [1, 4] |
| 8413 |                                 |        |             | -        | -   | -        | -  | -    | [1, 4] |
| 8508 |                                 |        |             | -        | -   | -        | -  | -    | [1, 4] |
| 9503 |                                 |        |             | -        | -   | -        | -  | -    | [1, 4] |
| 9406 |                                 |        |             | -        | -   | -        | -  | -    | [1, 4] |
| 9501 |                                 |        |             | 4.39E+09 | 323 | -        | 27 | 37.3 | [1]    |
| 8509 |                                 |        |             | -        | -   | -        | -  | -    | [1, 4] |
| 8510 |                                 |        |             | 1.79E+09 | 323 | -        | 23 | 28.9 | [1]    |
| 9105 | Fibrinogen alpha chain fragment | P02671 | 91.3 / 5.7  | -        | -   | -        | -  | -    |        |
| 9106 |                                 |        |             | 4.07E+07 | 306 | -        | 12 | 14.3 | [1]    |
| 9110 |                                 |        |             | -        | -   | -        | -  | -    |        |
| 9108 |                                 |        |             | -        | -   | -        | -  | -    |        |

|      |                           |         |            |          |     |          |    |      |           |
|------|---------------------------|---------|------------|----------|-----|----------|----|------|-----------|
| 6103 | Fibrinogen beta chain     | P02675  | 55.9 / 8.5 | 1.17E+06 | 103 | -        | 3  | 9.4  |           |
| 7203 | Fibrinogen beta chain     | P02675  | 55.9 / 8.5 | 5.10E+08 | 323 | -        | 19 | 48.9 |           |
| 7205 |                           |         |            | 1.94E+07 | 323 | -        | 9  | 23.8 |           |
| 9409 |                           |         |            | -        | -   | -        | -  | -    | [1,4]     |
| 6104 | Ficolin-3                 | O75636  | 32.9 / 6.2 | -        | -   | 3.12E+04 | 6  | 20.1 | [1, 2]    |
| 6606 | Gelsolin                  | P06396  | 85.7 / 5.9 | -        | -   | 1.64E+12 | 23 | 40.4 | [2]       |
| 4107 | Haptoglobin               | P00738  | 45.2 / 6.1 | 6.71E+08 | 323 | -        | 14 | 40.9 | [1]       |
| 4103 |                           |         |            | 6.62E+08 | 323 | -        | 14 | 40.6 | [1]       |
| 7002 |                           |         |            | 5.22E+08 | 323 | -        | 10 | 28.3 |           |
| 5104 | Haptoglobin beta chain    | P00738  | 27.2 / 6.3 | 3.23E+06 | 101 | -        | 2  | 6.9  |           |
| 5405 | Hemopexin                 | P02790  | 52.4 / 6.5 | -        | -   | -        | -  | -    |           |
| 6401 |                           |         |            | -        | 266 | -        | 8  | 20   | [2, 3]    |
| 6403 |                           |         |            | -        | 277 | -        | 9  | 20   | [3]       |
| 6404 |                           |         |            | -        | 49  | -        | 1  | 2    | [3]       |
| 6408 | Ig alpha-2 chain C region | P01877  | 36.9 / 5.8 | -        | -   | -        | -  | -    | [2, 4]    |
| 9010 | Ig kappa chain C region   | P01834  | 11.6 / 5.6 | -        | -   | -        | -  | -    | [4]       |
| 9007 |                           |         |            | -        | -   | -        | -  | -    | [4]       |
| 6002 |                           |         |            | -        | -   | 1.14E+03 | 2  | 30.2 | [1, 2]    |
| 1007 | Immunoglobulin J chain    | P01591  | 18.1 / 5.1 | -        | -   | 5.10E+03 | 7  | 50.3 |           |
| 1404 | Kininogen-1               | P01042  | 71.9 / 6.3 | 4.95E+08 | 323 | -        | 13 | 22.8 | [1]       |
| 1310 |                           |         |            | 2.59E+08 | 323 | -        | 17 | 22.8 |           |
| 8701 | Plasminogen               | P00747  | 90.6 / 7.0 | -        | -   | 9.09E+17 | 29 | 46.5 | [1, 2]    |
| 8703 |                           |         |            | -        | -   | 5.94E+12 | 22 | 30.6 | [1, 2]    |
| 8706 |                           |         |            | -        | -   | -        | -  | -    |           |
| 9701 |                           |         |            | -        | -   | -        | -  | -    | [1, 2, 4] |
| 7404 | Serotransferrin           | P02787  | 77.0 / 6.8 | 2.17E+08 | 323 | -        | 38 | 50.7 |           |
| 7619 |                           |         |            | -        | -   | -        | -  | -    | [1, 4]    |
| 7621 |                           |         |            | -        | -   | -        | -  | -    | [1, 4]    |
| 9015 | Serum amyloid A-4 protein | P35542  | 14.7 / 9.1 | 1.52E+08 | 70  | -        | 2  | 14.6 |           |
| 6109 | Unidentified              | Unknown | -          | -        | -   | -        | -  | -    |           |

|      |                           |         |            |   |   |         |    |      |     |
|------|---------------------------|---------|------------|---|---|---------|----|------|-----|
| 6205 | Unidentified              | Unknown | -          | - | - | -       | -  | -    |     |
| 7311 | Unidentified              | Unknown | -          | - | - | -       | -  | -    |     |
| 2304 | Vitamin D-binding protein | P02774  | 52.9 / 5.4 | - | - | 1.22E+9 | 15 | 33.5 | [2] |
| 3301 |                           |         |            | - | - | -       | -  | -    |     |

## References

1. Wåhlén, K., B. Ghafouri, N. Ghafouri, and B. Gerdle, Plasma Protein Pattern Correlates With Pain Intensity and Psychological Distress in Women With Chronic Widespread Pain. *Frontiers in Psychology*, 2018. 9(2400).
2. Wåhlén, K., Olausson, P., Carlsson, A., Ghafouri, N., Gerdle, B., & Ghafouri, B. (2017). Systemic alterations in plasma proteins from women with chronic widespread pain compared to healthy controls: a proteomic study. *J Pain Res*, 10, 797-809. doi:10.2147/jpr.s128597.
3. Ghafouri, B., Carlsson, A., Holmberg, S., Thelin, A., & Tagesson, C. (2016). Biomarkers of systemic inflammation in farmers with musculoskeletal disorders; a plasma proteomic study. *BMC Musculoskelet Disord*, 17(1), 206. doi:10.1186/s12891-016-1059-y
4. Swiss Institute of Bioinformatics, SWISS 2D-PAGE, ExPASy Molecular Biology Server at <https://world-2dpage.expasy.org/swiss-2dpage/>

**Supplementary Figure S1.** Representative plasma proteome showing location of significant proteoforms. Protein spot numbers correspond to equal numbers in each multivariate data analysis model and MS data in Supplementary Table S1. For the original two-dimensional gel, uncropped and unadjusted contrast, see figure below. MW: molecular weight, pI: isoelectric point.

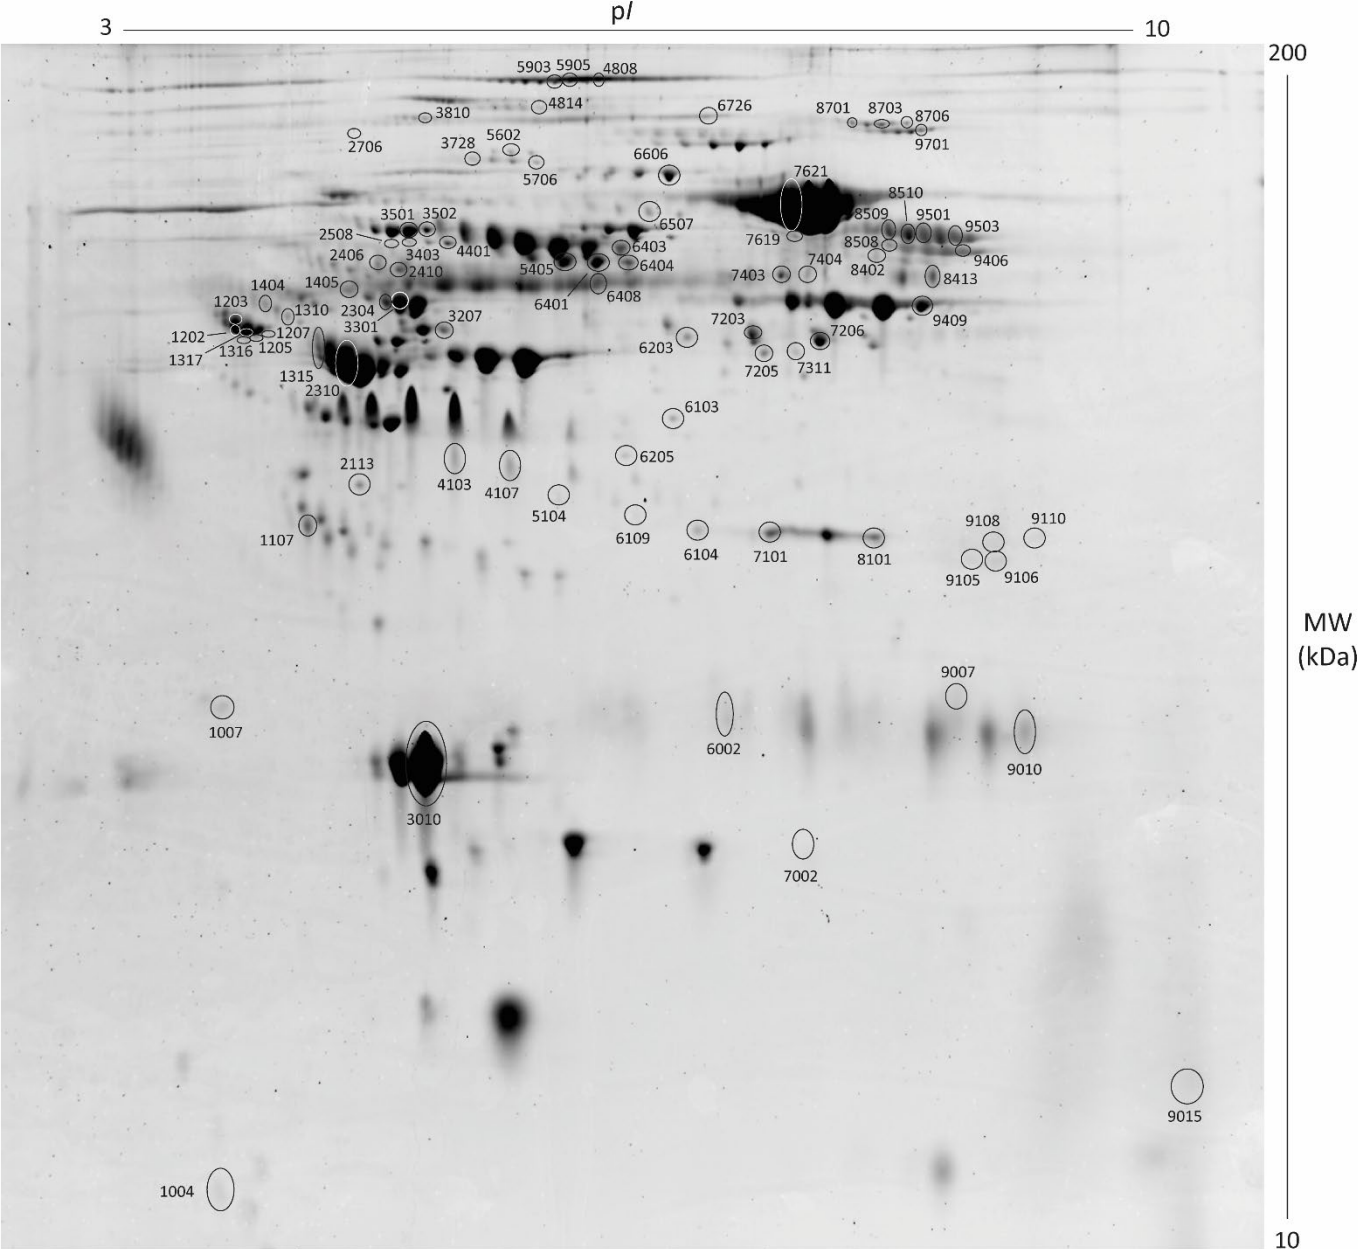

Original two-dimensional gel

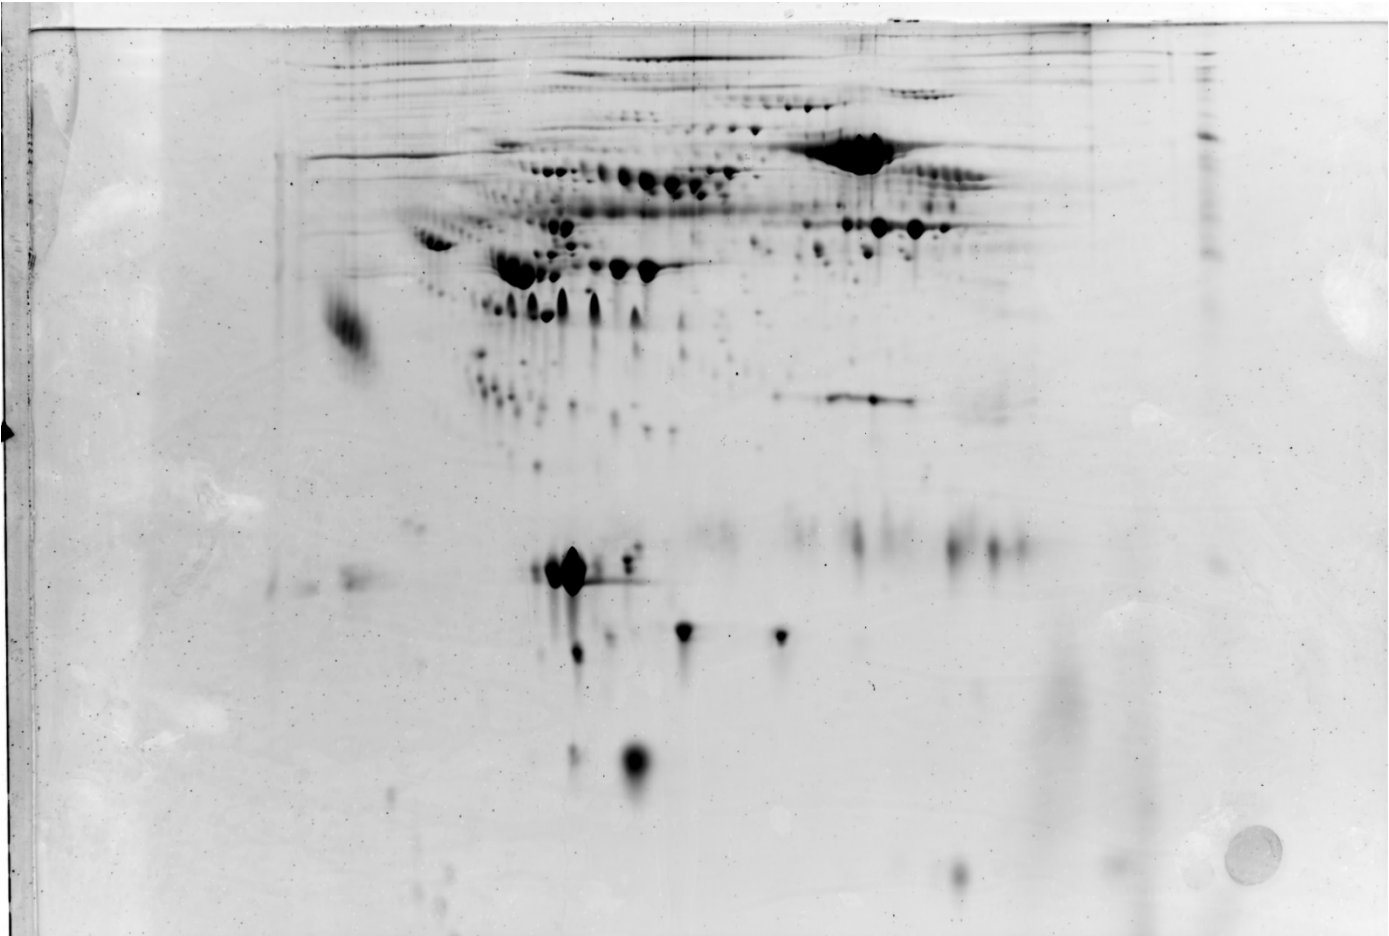

**Supplementary Figure S2. Correlation matrix of VAS and significant proteoforms in FM.** Spearman correlation matrix of VAS and significant proteoforms from the OPLS model of VAS in FM. Ten of the proteoforms had a significant correlation with VAS. The higher color intensity, the stronger correlation. Red = negative correlation, blue = positive correlation. Variable names are protein accession number and protein spot number, which are equal to presented number in Figure 3 and Table 3, and Supplementary Table S1 and Figure S1. \* =  $p < 0.05$ , \*\* =  $p < 0.01$ , VAS = visual analogue scale.

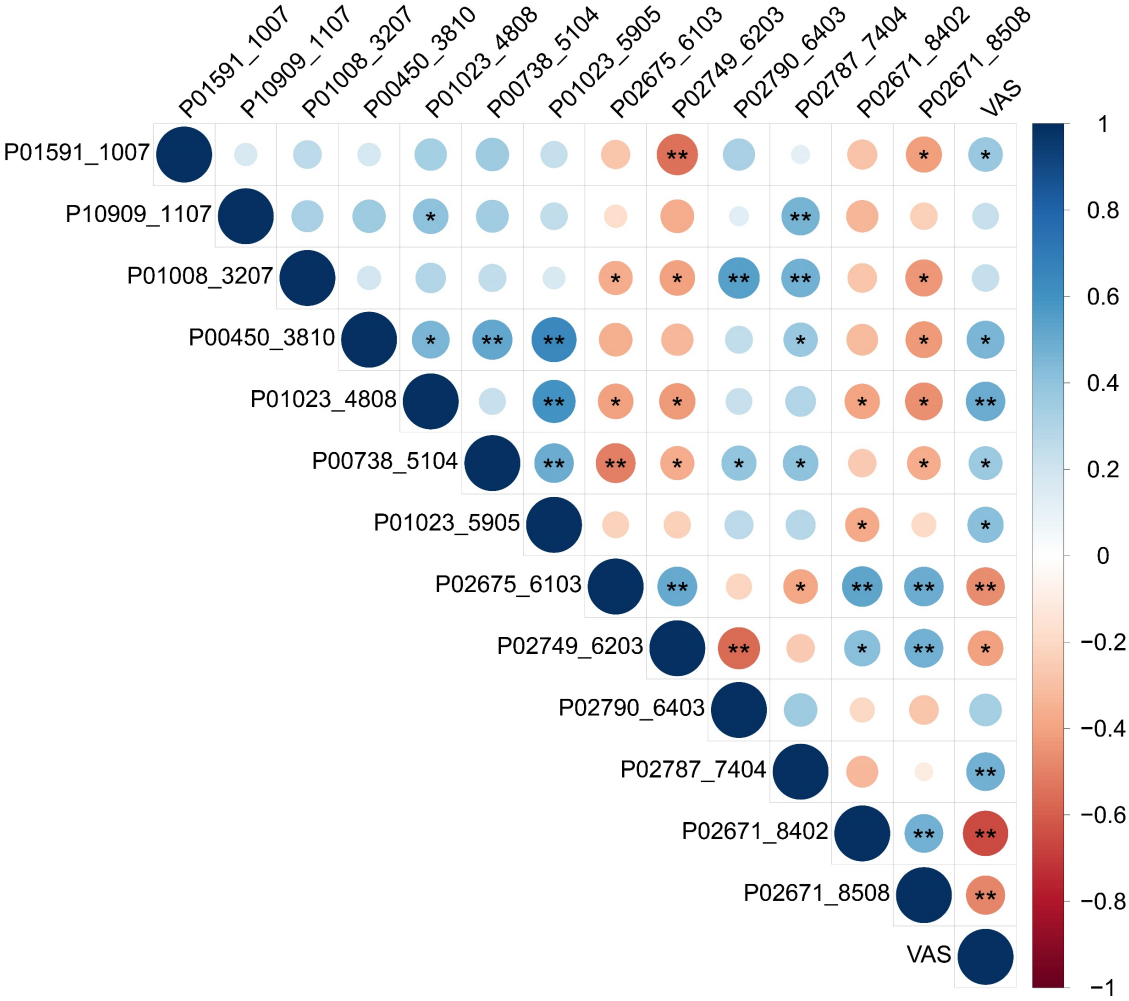



**Supplementary Figure S3. Correlation matrix of PPT and significant proteoforms in FM.** Spearman correlation matrix of PPT and significant proteoforms from the OPLS model of PPT in FM. Six of the proteoforms had a significant correlation with PPT in FM. The higher color intensity, the stronger correlation. Red = negative correlation, blue = positive correlation. Variable names are protein accession number and protein spot number, which are equal to presented number in Figure 4 and Table 4, and Supplementary Table S1 and Figure S1. \* =  $p < 0.05$ , \*\* =  $p < 0.01$ , PPT = pressure pain thresholds.

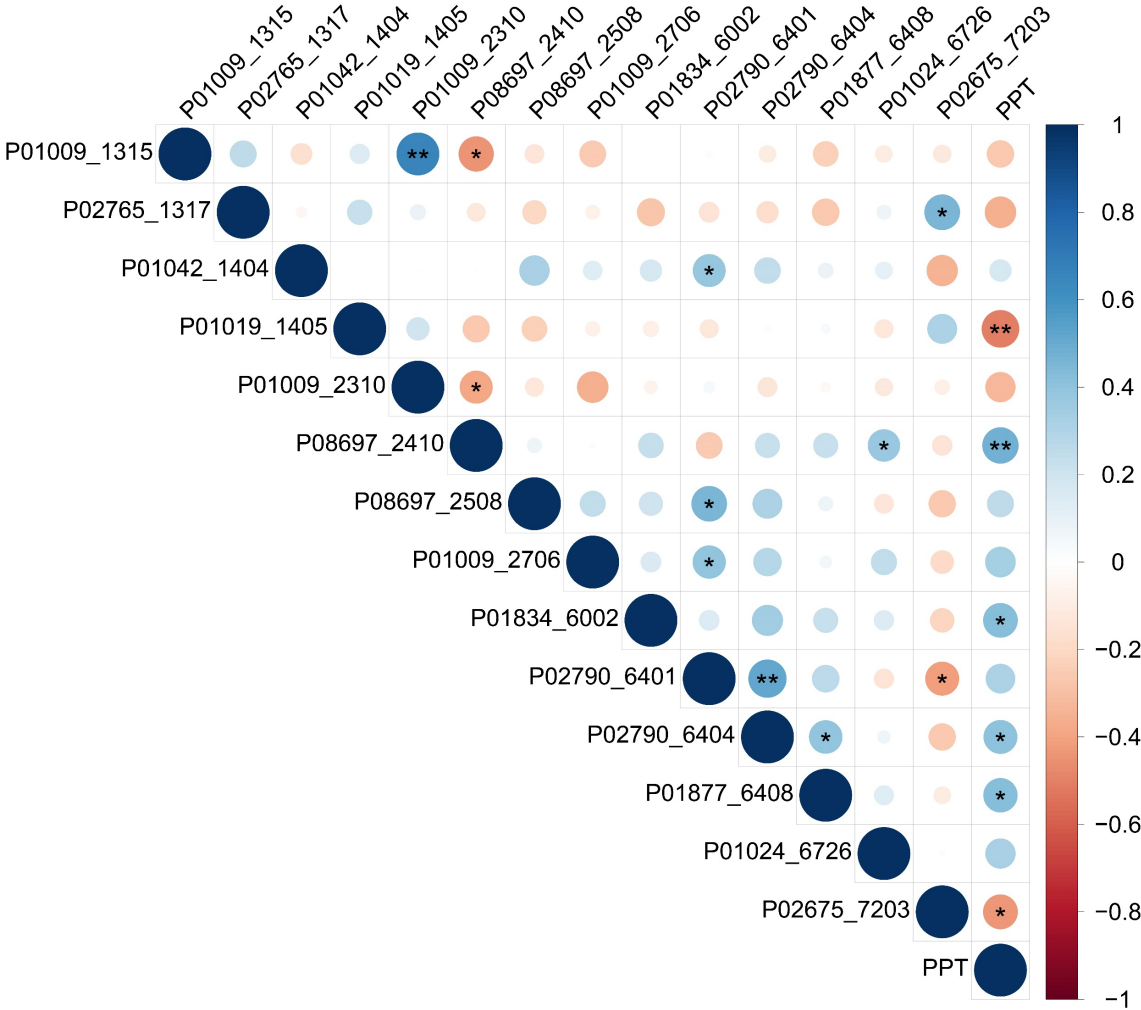

**Supplementary Figure S4. Correlation matrix of HADS and significant proteoforms in FM.**

Spearman correlation matrix of HADS and significant proteoforms from the OPLS model of HADS in FM. Seventeen proteoforms had a significant correlation with HADS. The higher color intensity, the stronger correlation. Red = negative correlation, blue = positive correlation. Variable names are protein accession number and protein spot number, which are equal to presented number in Figure 5 and Table 5, and Supplementary Table S1 and Figure S1. \* =  $p < 0.05$ , \*\* =  $p < 0.01$ , HADS = hospital anxiety and depression scale.

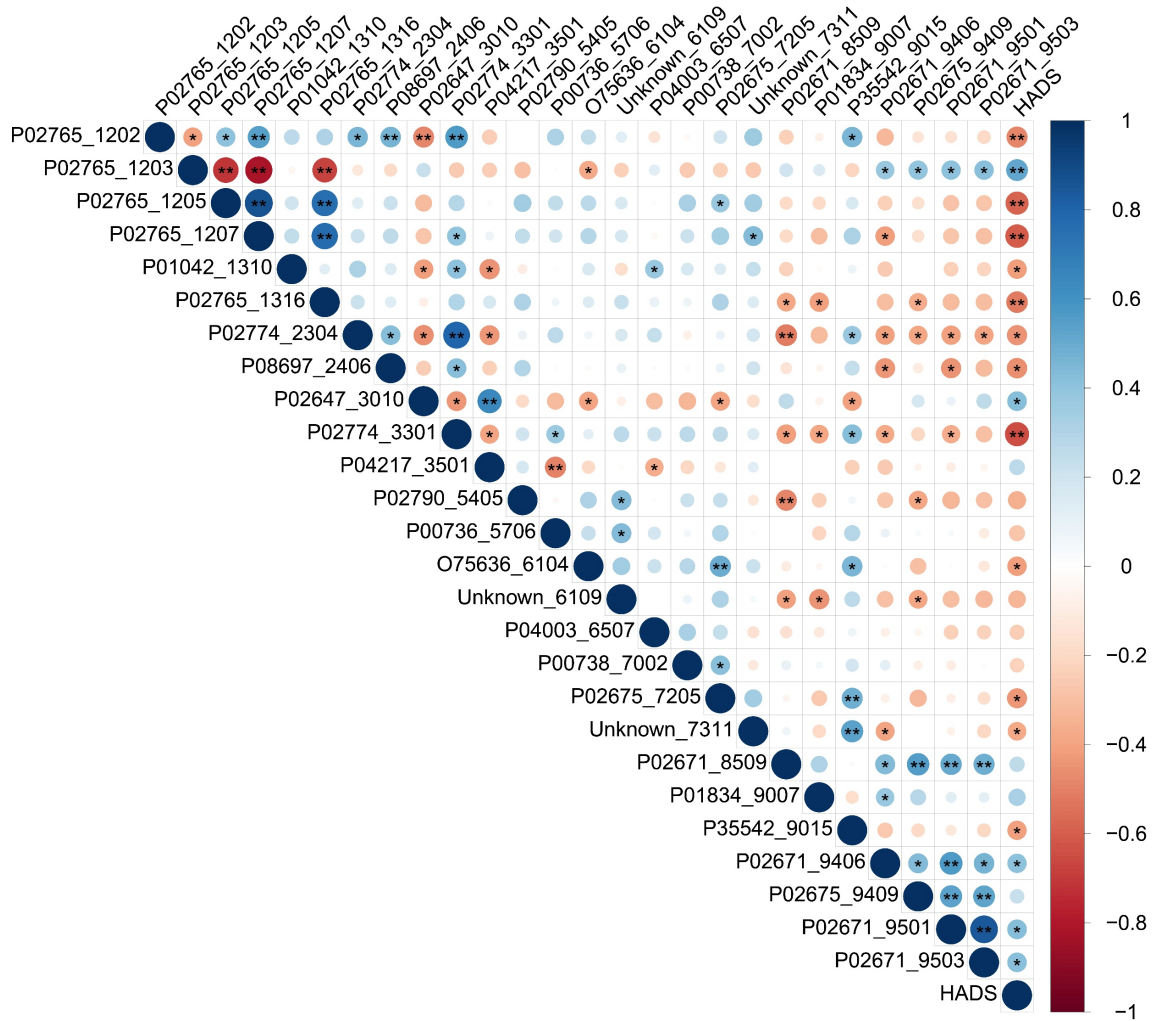

Supplement: 41598_2020_69422_MOESM1_ESM.pdf [file 41598_2020_69422_MOESM1_ESM.pdf]
